# Supplementary material
Source: publisher figshare collection journal article supplement (https://sage.figshare.com/ndownloader/files/39439747)
Supplement: Supplementary file 1 [file 39439747]

Supplementary Table 3 Oligonucleotide sequences used in this study

| Gene | Sequence |
| --- | --- |
| E-cadherin | F:5'-CGAGAGCTACACGTTCACGG -3' |
| E-cadherin | R:5'-GGCCTTTTGACTGTAATCACACC-3' |
| N-cadherin | F:5'-CAACTTGCCAGAAAACTCCAGG-3' |
| N-cadherin | R:5'-ATGAAACCGGGCTATCTGCTC-3' |
| Vimentin | F:5'-CGCCTGCAGGATGAGATTCAG-3' |
| Vimentin | R:5'-TCAGGGAGGAAAAGTTTGGAAGA-3' |
| Snai1 | F:5'-ACGAGGTGTGACTAACTAT-3' |
| Snai1 | R:5'-CGACAAGTGACAGCCATT-3' |
| Twist1 | F:5'-ACCATCCTCACACCTCTG-3' |
| Twist1 | R:5'-GATTGGCACGACCTCTTG-3' |
| Zeb1 | F:5'-TCATCGCTACTCCTACTGT-3' |
| Zeb1 | R:5'-TCACTGTCTTCATCCTCTTC-3' |
| β-catenin | F:5'-ATGGCTTGGAATGAGAC-3' |
| β-catenin | F:5'-ATGGCTTGGAATGAGAC-3' |
| Ki67 | R:5'-AAACCCCACCAAGTAAAACA-3' |
| Ki67 | R:5'-CCAAGGCAAGCTCAGGAC-3' |
| F, forward; R, reverse. | |
